# Supplementary material
Source: publisher figshare collection journal article supplement (https://gsapubs.figshare.com/ndownloader/files/34853178)
Supplement: Supplementary file 1 [file 34853178]

## Sheet: Supplementary Table 1
Table S1. Trilobites with known appendages. * denotes article that figures specimen with preserved appendages.
Species	Order	Family	Period	Series	Stage	Formation	Preservation Type	Country	Antenna	Endopodite	Exopodite	Protodite	References
Eoredlichia intermediata	Redlichiida	Redlichiidae	Cambrian	Series 2	Stage 3	Chengjiang Formation	Burgess	China	Complete	Complete	Complete	Complete	Shu et al., 1995*; Ramsköld & Edgecombe, 1996; Chen & Zhou, 1997; Hou et al., 2008*
Yunnanocephalus yunnanensis	Ptychopariida	Yunnanocephalidae	Cambrian	Series 2	Stage 3	Chengjiang Formation	Burgess	China	Complete	Incomplete	Incomplete	Absent	Shu et al., 1995*; Ramsköld & Edgecombe, 1996; Chen & Zhou, 1997;
Kuanyangia pustulosa	Redlichiida	Redlichiidae	Cambrian	Series 2	Stage 3	Chengjiang Formation	Burgess	China	Complete	Incomplete	Incomplete	Absent	Chen & Zhou, 1997; Hou & Bergström, 1997*?;
Hongshiyanaspis yiliangensis	Redlichiida	Metadoxididae	Cambrian	Series 2	Stage 3	Hongjingshao Formation	Burgess	China	Complete	Complete	Complete	Complete	Zeng et al., 2017
Zhangshania typica	Redlichiida	Gigantopygidae	Cambrian	Series 2	Stage 3	Hongjingshao Formation	Burgess	China	Complete	Absent	Absent	Absent	Hou et al., 2017*
Olenellus getzi	Redlichiida	Olenellidae	Cambrian	Series 2	Stage 3	Kinzers Formation	Burgess	United States of America	Complete	Absent	Absent	Absent	Dunbar, 1925*
Redlichia mansuyi	Redlichiida	Redlichiidae	Cambrian	Series 2	Stage 4	Guanshan Formation	Burgess	China	Complete	Incomplete	Incomplete	Absent	Hu et al., 2013*
Redlichia mai	Redlichiida	Redlichiidae	Cambrian	Series 2	Stage 4	Guanshan Formation	Burgess	China	Incomplete	Incomplete	Incomplete	Absent	Hu et al., 2013*
Palaeolenus douvillei	Ptychopariida	Palaeolenidae	Cambrian	Series 2	Stage 4	Guanshan Formation	Burgess	China	Incomplete	Absent	Absent	Absent	Hu et al., 2013*
Palaeolenus lantenoisi	Ptychopariida	Palaeolenidae	Cambrian	Series 2	Stage 4	Guanshan Formation	Burgess	China	Complete	Incomplete	Incomplete	Absent	Hu et al., 2013*
Megapalaeolenus deprati	Ptychopariida	Palaeolenidae	Cambrian	Series 2	Stage 4	Guanshan Formation	Burgess	China	Complete	Absent	Absent	Absent	Hu et al., 2013*
Redlichia rex	Redlichiida	Redlichiidae	Cambrian	Series 2	Stage 4	Emu Bay Shale	Mudstone mould	Australia	Incomplete	Complete	Complete	Complete	McHenry & Yates 1999*, Holmes et al., 2020*
Redlichia takooensis	Redlichiida	Redlichiidae	Cambrian	Series 2	Stage 4	Emu Bay Shale	Mudstone mould	Australia	Incomplete	Absent	Absent	Absent	McHenry & Yates 1993, Holmes et al., 2020*
Olenoides serratus	Corynexochida	Dorypygidae	Cambrian	Miaolingian	Wuliuan	Burgess Shale	Burgess	Canada	complete	Complete	Complete	Complete	Walcott, 1918*, 1921*; Raymond, 1920; Størmer, 1939*, 1951; Whittington 1975, 1980, Bicknell 2020
Kootenia burgessensis	Corynexochida	Dorypygidae	Cambrian	Miaolingian	Wuliuan	Burgess Shale	Burgess	Canada	Absent	Incomplete	Incomplete	Absent	Walcott, 1918*; Raymond, 1920; Stormer, 1939*; Whittington, 1975*
Elrathia permulta	Ptychopariida	Alokistocaridae	Cambrian	Miaolingian	Wuliuan	Burgess Shale	Burgess	Canada	Complete	Absent	Absent	Absent	Walcott, 1918*, 1921*; Raymond, 1920; Størmer 1939
Elrathina cordillerae	Ptychopariida	Ptychopariidae	Cambrian	Miaolingian	Wuliuan	Burgess Shale	Burgess	Canada	Absent	Incomplete	Absent	Absent	ROM 60743
Elrathia kingii	Ptychopariida	Alokistocaridae	Cambrian	Miaolingian	Drumian	Wheeler Formation	Burgess	United States of America	Absent	Incomplete	Absent	Absent	Briggs et al., 2008*
Agnostus pisiformis	Agnostida	Agnostidae	Cambrian	Miaolingian	Guzhangian	Orsten	Phosphatic	Sweden	Complete	Complete	Complete	Complete	Müller & Walossek, 1987*
Bavarilla sp.	Phacopida	Bavarillidae	Ordovician	Lower	Tremadocian	Fezouata Shale	Burgess	Morocco	Incomplete	Incomplete	Absent	Absent	Martin et al., 2015
Megistaspis (Ekeraspis) hammondi	Asaphida	Asaphaidae	Ordovician	Lower	Tremadocian	Fezouata Shale	Burgess	Morocco	Incomplete	Complete	Complete	Absent	Gutiérrez-Marco et al., 2017*
Symphysurus sp.	Asaphida	Nileidae	Ordovician	Lower	Tremadocian	Fezouata Shale	Burgess	Morocco	Incomplete	Incomplete	Absent	Absent	Van Roy et al., 2010
Anacheirurus adserai	Phacopida	Cheiruridae	Ordovician	Lower	Tremadocian	Fezouata Shale	Burgess	Morocco	Absent	Complete	Complete	Incomplete	Pérez-Peris et al., 2021*
Placoparia cambriensis	Phacopida	Pliomeridae	Ordovician	Middle	Darriwilian	Lower Llanvirn	Mudstone mould	United Kingdom	Complete	Absent	Absent	Absent	Whittington, 1993*
Triarthrus eatoni	Ptychopariida	Olenidae	Ordovician	Upper	Katian	Frankfort Formation	Pyritic	United States of America	Complete	Complete	Complete	Incomplete	Walcott, 1918*, 1921*;Raymond, 1920; Cisne, 1975*; Whittington and Almond, 1987*; Farell et al., 2009*; Hegna et al., 2017; Hou et al., 2021*
Cryptolithus bellulus	Asaphida	Trinucleidae	Ordovician	Middle-Upper	Darriwilian - Katian	Frankfort Formation, Rust Formation	Pyritic, calcitic	United States of America	Incomplete	Incomplete	Incomplete	Complete	Beecher, 1890; Raymond, 1920; Størmer, 1939; Bergström, 1972; Farrell et al., 2009*
Meadowtownella trentonensis	Odontopleurida	Odontopleuridae	Ordovician	Upper	Darriwilian - Katian	Rust Formation	Calcitic	United States of America	Absent	Incomplete	Incomplete	Incomplete	Walcott, 1881*, 1918*, 1921*;Raymond 1920*; Størmer, 1939; Brett, et al., 1999
Ceraurus pleurexanthemus	Phacopida	Cheiruridae	Ordovician	Upper	Darriwilian - Katian	Rust Formation	Calcitic	United States of America	Absent	Complete	Complete	Incomplete	Walcott, 1918*, 1921*; Raymond, 1920*; Stormer 1939, 1951; Bergström, 1972; Siveter et al., 2021
Flexicalymene senaria	Phacopida	Calymenidae	Ordovician	Upper	Darriwilian - Katian	Rust Formation	Calcitic	United States of America	Absent	Incomplete	Incomplete	Incomplete	Walcott, 1918*, 1921*; Raymond, 1920*; Størmer 1939; Brett et al., 1999; Siveter et al., 2021
Isotelus gigas	Asaphida	Asaphaidae	Ordovician	Upper	Darriwilian - Katian	Rust Formation	Calcitic	United States of America	Absent	Incomplete	Absent	Incomplete	Walcott, 1881*
Isotelus latus	Asaphida	Asaphaidae	Ordovician	Upper	Darriwilian - Katian	Trenton Gr.	Mudstone impression	United States of America	Absent	Incomplete	Absent	Incomplete	Billings, 1870; Raymond, 1920
Isotelus maximus	Asaphida	Asaphaidae	Ordovician	Upper	-	Richmond Gr.	Mudstone impression	United States of America	Absent	Incomplete	Absent	Incomplete	Mickleborough, 1883*, 1884*; Walcott, 1884*, 1918*; Raymond 1920
Primaspis sp. X	Odontopleurida	Odontopleuridae	Ordovician	Upper	-	Clays Ferry Formation	Silicified	United States of America	Absent	Incomplete	Absent	Incomplete	Ross, 1979*
Rhenops cf. anserinus	Phacopida	Acastidae	Devonian	Lower	Esmian	Hunsrück Slate	Pyritic	Germany	Complete	Complete	Incomplete	Incomplete	Bergström and Brassel, 1984*; Bartels, Briggs and Brassel, 1998*
Chotecops ferdinandi	Phacopida	Phacopidae	Devonian	Lower	Esmian	Hunsrück Slate	Pyritic	Germany	Complete	Complete	Complete	Complete	Størmer, 1939*; Stürmer & Bergström, 1973*; Bartels, Briggs and Brassel, 1998*
Odontochile rhenanus	Phacopida	Dalmanitidae	Devonian	Lower	Esmian	Hunsrück Slate	Pyritic	Germany	Incomplete	Absent	Absent	Absent	Bartels, Briggs and Brassel, 1998*
Asteropyge sp.	Phacopida	Acastidae	Devonian	Lower	Esmian	Hunsrück Slate	Pyritic	Germany	Complete	Incomplete	Incomplete	Incomplete	Størmer, 1939; Stürmer & Bergström, 1973*
Dalmanites sp.	Phacopida	Dalmanitidae	Silurian	Wenlock	-	Coalbrookdale Formation	Calcitic	United Kingdom	Absent	Incomplete	Complete	Complete	Siveter et al., 2021

## Sheet: Supplementary Table 2
Table S2. Olenoides serratus endopodite podomere measurements. All measurements made in mm. Abbreviations: app, appendage; L, left; l, length along ramus axis; Pn, podomere number; R, right; w, width at midpoint of podomere. ROMIP refers to catalog numbers, ROM refers to field numbers.
Specimen	Appendage	Protopodite length	Protopodite width	P7 length	P7 width	P6 length	P6 width	P5 length	P5 width	P4 length	P4 width	P3 length	P3 width	P2 length	P2 width
ROMIP 66299*	R 10	0.632667	0.773	0.137333	0.131	0.124667	0.131667	0.135333	0.089	0.098	0.083	0.132333	0.0683333	0.062	0.046
ROMIP 66299*	R 11	0.579333	-	0.192333	0.173333	0.089	0.129	0.096	0.0976667	-	-	-	-	-	-
ROMIP 66299*	R 8	0.950333	-	0.415667	-	0.360333	0.338333	0.372333	0.285333	-	-	-	-	-	-
GSC 34692	R 9	-	-	0.476333	0.380333	0.327333	0.325667	0.223667	0.201	0.279	0.1765	0.383333	0.112333	0.270333	0.114333
GSC 34692	L 8	-	-	-	-	-	-	-	-	0.368	0.1945	0.326667	0.107	0.267	0.132333
GSC 34692	L 9	-	-	-	-	-	-	0.350333	0.277667	0.349	0.2095	-	-	-	-
GSC 34692	L 10	-	-	-	-	0.311	0.322667	0.358	0.257333	-	-	-	-	-	-
GSC 34692	L 14	-	-	0.464667	0.344333	0.281667	0.299	0.35	0.210333	-	-	-	-	-	-
GSC 34692	L 15	-	-	0.459333	0.302667	0.416667	0.232	0.506667	0.213	0.28	0.190333	0.28	0.190333	0.208	0.125667
GSC 34692	L 16	-	-	-	-	-	-	-	-	0.388667	0.196333	0.250333	0.068	-	-
GSC 34694A	R 10	0.691667	-	0.2704	0.293667	0.273333	0.232667	0.306333	0.217333	0.352667	0.179667	0.287333	0.0936667	0.23	0.0893333
GSC 34694A	R 12	0.7	-	0.313333	0.264	0.285667	0.233333	0.282	0.230333	0.346667	0.183333	0.267667	0.101	0.231	0.092
GSC 34694A	R 14	-	-	-	-	-	-	0.266333	0.230333	0.307667	0.195	0.291	0.0883333	0.213	0.0833333
USNM 57656	R 4	-	-	-	-	-	-	-	-	0.340333	0.171	0.286	0.0936667	0.200667	0.106333
USNM 57656	R 5	-	-	-	-	-	-	0.268	0.221333	0.266333	0.164	0.219	0.101333	0.152	0.0753333
USNM 57656	R 6	-	-	-	-	0.318333	0.361	0.335	0.292667	0.342667	0.218667	0.378667	0.106	-	-
USNM 57656	R 7	-	-	-	-	-	-	-	-	0.314	0.226333	0.269	0.132667	0.216667	0.119333
USNM 57656	R 8	-	-	-	-	-	-	0.282	0.295	0.322	0.238	0.244	0.137	0.245333	0.119333
USNM 57656	R 9	-	-	-	-	-	-	0.247667	0.311	0.296667	0.242333	0.238333	0.12	0.242333	0.125667
USNM 57656	R 15	0.320667	0.299	0.201333	0.245667	0.245667	0.165333	0.178333	0.154667	0.138667	0.143	-	-	-	-
USNM 57656	L 15	-	-	0.194	0.208	-	-	-	-	-	-	-	-	-	-
USNM 58588A	L 5	-	-	-	-	-	-	0.332333	0.37	0.396667	0.326333	-	-	-	-
USNM 58588A	L 6	-	-	-	-	-	-	0.365333	0.247667	0.399667	0.187667	0.333	0.102667	0.279	0.107667
USNM 58588A	L 7	-	-	-	-	-	-	-	-	-	-	0.333	0.093	-	-
USNM 58588A	L 8	-	-	-	-	-	-	0.443667	0.258	0.442	0.185333	0.305	0.106	0.217333	0.0996667
USNM 58588A	L 9	-	-	-	-	-	-	0.348667	0.236333	0.352333	0.169667	0.323667	0.117667	0.289333	0.116667
USNM 58588A	L 10	-	-	-	-	-	-	0.312667	0.224333	0.375	0.212333	0.335333	0.123667	0.258667	0.130667
USNM 58588A	L 11	-	-	-	-	-	-	-	-	0.366	0.185667	0.292	0.114333	0.243667	0.121333
USNM 58588A	L 12	-	-	-	-	-	-	-	-	-	-	0.257667	0.082	0.162	0.082
USNM 58588B	L 3	-	-	-	-	-	-	-	-	-	-	0.333	0.093	-	-
USNM 58588B	L 4	-	-	-	-	-	-	0.365333	0.247667	0.399667	0.187667	0.333	0.102667	0.279	0.107667
USNM 58588B	L 5	-	-	-	-	-	-	0.443667	0.258	0.442	0.185333	0.305	0.106	0.217333	0.0996667
USNM 58588B	L 6	-	-	-	-	-	-	0.384333	0.256333	0.410333	0.203667	0.371	0.103333	0.242667	0.087
USNM 58588B	L 7	-	-	-	-	0.447333	0.268	0.39	0.224	0.412667	0.188667	0.283333	0.111333	0.269667	0.107667
USNM 58589	R 15	-	-	-	-	-	-	0.229	0.156333	0.237667	0.119	0.207	0.068	0.172	0.0666667
USNM 58589	R 14	-	-	-	-	-	-	-	-	-	-	0.227	0.0803333	0.143667	0.0633333
USNM 58589	R 13	-	-	-	-	-	-	-	-	0.262333	-	0.225333	0.1	0.223667	0.088
USNM 58589	R 12	-	-	-	-	-	-	0.285667	0.156333	0.232	0.1545	0.228	0.103	0.225	0.0963333
USNM 58589	L 4	-	-	-	-	-	-	-	-	0.436	0.176	0.334333	0.0953333	0.272667	0.0856667
USNM 58589	L 5	-	-	-	-	0.347	0.269667	0.362667	0.233667	0.404	0.1875	0.303333	0.0823333	0.228	0.076
USNM 58589	L 6	-	-	-	-	0.393667	0.258	0.376667	0.242	0.433667	0.188	0.336667	0.0856667	0.233333	0.09
USNM 58589	L 7	-	-	-	-	-	-	0.386333	0.229667	0.379	0.2315	0.441	0.195	0.322	0.092
USNM 58589	L 8	-	-	-	-	0.522667	0.270667	0.377333	0.234333	0.422667	0.198	0.326	0.086	0.274333	0.0976667
USNM 58589	L 9	-	-	-	-	0.401333	0.277	0.369333	0.246333	0.397667	0.201	0.295667	0.089	0.230667	0.0996667
USNM 58589	L 10	-	-	-	-	-	-	-	-	-	-	0.267333	0.0873333	0.217667	0.0906667
USNM 58589	L 11	-	-	-	-	-	-	-	-	0.293	0.184	0.258333	0.0933333	0.205333	0.0966667
USNM 58589	L 12	-	-	-	-	-	-	-	-	0.272667	0.18	0.1646	0.0883333	0.201	0.096
USNM 58590	L 1	-	-	-	-	-	-	-	-	0.372667	0.148667	0.251	0.092	0.227667	0.0973333
USNM 58590	L 2	-	-	-	-	-	-	-	-	-	-	0.280333	0.122333	0.287667	0.0983333
USNM 58590	L 3	-	-	-	-	0.439	0.324667	0.340667	0.268	0.369667	0.203667	0.281667	0.118	0.251	0.103667
USNM 65514	L 14	-	-	-	-	-	-	-	-	0.186667	0.09	0.164	0.0573333	0.112667	0.0543333
USNM 65514	L 13	-	-	-	-	-	-	0.257667	0.146333	0.294	0.120333	-	-	-	-
USNM 65514	L 12	-	-	-	-	-	-	0.269333	0.145667	0.321333	0.125333	0.296667	0.072	-	-
USNM 65514	L 11	-	-	-	-	-	-	0.283333	0.17	0.298333	0.138667	0.323333	0.082	-	-
USNM 65514	L 10	-	-	-	-	-	-	0.277667	0.156	0.319	0.122333	0.292	0.0683333	-	-
USNM 65514	L 9	-	-	-	-	0.266667	0.222333	0.277333	0.168	0.318	0.120667	-	-	-	-
USNM 65514	R 7	-	-	0.365333	0.316	0.367	0.287667	0.311333	0.232333	-	-	-	-	-	-
USNM 65514	R 6	-	-	-	-	0.411333	0.279333	0.315333	0.243333	0.246	0.237667	-	-	-	-
USNM 65519	L 2	-	-	-	-	-	-	-	-	-	-	-		0.26	0.081
USNM 65519	L 3	-	-	-	-	-	-	-	-	0.391333	0.170667	0.266667	0.0923333	0.211333	0.0906667
USNM 188573	L 7	-	-	-	-	-	-	-	-	0.368	0.232333	0.284667	0.116667	0.254	0.0903333
USNM 188573	L 8	-	-	-	-	-	-	-	-	0.339333	0.166	-	-	-	-
USNM 188573	L 9	-	-	-	-	-	-	0.316333	0.278	0.376333	0.223667	-	-	-	-
USNM 188573	L 10	-	-	-	-	-	-	-	-	-	-	0.297	0.0886667	0.178	0.095
USNM 188573	L 11	-	-	-	-	-	-	0.248	0.160667	0.299333	0.101333	0.319667	0.085	0.217667	0.072
ROM 75-4877	R 1	-	-	-	-	-	-	-	-	-	-	0.292333	0.0976667	0.280667	0.103667
ROM 75-4877	R 2	-	-	-	-	-	-	-	-	-	-	0.275333	0.116	0.293667	0.085
ROM 75-4877	R 3	-	-	-	-	-	-	-	-	-	-	0.278333	0.0983333	0.178667	0.108
ROM 98-1996	R 15	-	-	-	-	-	-	0.304667	0.199	0.371333	0.161	0.295333	0.0943333	0.251	0.0823333

## Sheet: Supplementary Table 3
Table S3. Appendage preservation in Olenoides serratus. Measurements follw Fig. S4. * denotes specimen with known claspers shown in Fig. 1. ROMIP refers to catalog numbers, ROM refers to field numbers.
Specimen number	Length (mm)		Width (mm)	Antenna	Biramous appendage	Endopodite 10 and/or 11		Clasper	Likely sex		Color coding for columns E-I			Color coding for Column J
	Thorax	Pygidium	3rd tergite without spine			any	Complete
GSC 34294A	21.8	18.1	16.97	Absent	Present	Present	Present	Absent	Possibly female			Uncertain			Uncertain
GSC 34692	-	-	-	Absent	Present	Uncertain	Absent	Absent	Uncertain			Present			Possibly female size unkown or smaller than ROM 981113
GSC 61365	32.36	24.227	-	Absent	Present	Present	Absent	Absent	Possibly female			Inapplicable			Likely female similar size t0 ROM 981113
GSC 61374 a & b	-	-	-	Absent	Absent	Absent	Inapplicable	Inapplicable	Uncertain			Absent			Male
GSC 74993-2 a & b	27.2	23.4	24.3	Absent	Present	Present	Present	Absent	Likely female
GSC 81177 a & b	39.91	28.7	28.34	Absent	Present	Absent	Inapplicable	Inapplicable	Uncertain
GSC 81310 a	-	-	-	Absent	Present	Present	Absent	Absent	Possibly female
ROM 000976	-	-	-	Present	Present	Present	Present	Absent	Possibly female
ROM 001994	26.5	-	22.57	Absent	Absent	Absent	Inapplicable	Inapplicable	Uncertain
ROM 56633	35.34	26.73	20.64	Absent	Present	Uncertain	Absent	Absent	Uncertain
ROM 56634	29.46	20.93	22.47	Absent	Present	Absent	Inapplicable	Inapplicable	Uncertain
ROM 56635	-	-	-	Absent	Present	Absent	Inapplicable	Inapplicable	Uncertain
ROM 56636	-	-	-	Absent	Present	Uncertain	Absent	Absent	Uncertain
ROM 56637	24.61	23.52	20.92	Absent	Absent	Absent	Inapplicable	Inapplicable	Uncertain
ROM 5789-185, 890186 5-7	-	-	-	Present	Absent	Absent	Inapplicable	Inapplicable	Uncertain
ROM 75-4877	26.55	-	21.99	Present	Present	Absent	Inapplicable	Inapplicable	Uncertain
ROM 931340 a & b	-	-	-	Present	Present	Absent	Inapplicable	Inapplicable	Uncertain
ROM 9313927	-	-	-	Present	Absent	Absent	Inapplicable	Inapplicable	Uncertain
ROM 95-182	28.15	21.109	18.95	Absent	Absent	Absent	Inapplicable	Inapplicable	Uncertain
ROM 961485	27.82	-	22.5	Present	Present	Absent	Inapplicable	Inapplicable	Uncertain
ROM 98-1996	-	-	-	Absent	Present	Present	Absent	Absent	Possibly female
ROM 980317 a & b	-	-	-	Present	Present	Absent	Inapplicable	Inapplicable	Uncertain
ROM 980334 a & b	-	-	-	Present	Present	Absent	Inapplicable	Inapplicable	Uncertain
ROM 980353 a & b	-	-	-	Absent	Present	Absent	Inapplicable	Inapplicable	Uncertain
ROM 980520	-	-	-	Present	Absent	Absent	Inapplicable	Inapplicable	Uncertain
ROM 980765 a & b	-	-	-	Present	Present	Absent	Inapplicable	Inapplicable	Uncertain
ROM 980851	-	-	-	Absent	Present	Absent	Inapplicable	Inapplicable	Uncertain
ROMIP 66299*	32.23	21.01	19.88	Absent	Present	Present	Present	Present	Male
ROM 981159 a & b R	-	-	-	Absent	Absent	Absent	Inapplicable	Inapplicable	Uncertain
ROM 981159 a & b L	-	-	-	Present	Absent	Absent	Inapplicable	Inapplicable	Uncertain
ROM 981208	31.88	22.83	20.69	Present	Present	Absent	Inapplicable	Inapplicable	Uncertain
ROM 981390	17.84	13.92	13.55	Present	Present	Present	Absent	Absent	Possibly female
ROM 981513	21.2	14.6	14.06	Absent	Present	Present	Absent	Absent	Possibly female
ROM 981585	27.7	18.6	19.4	Absent	Absent	Absent	Inapplicable	Inapplicable	Uncertain
ROM 981781	-	-	-	Present	Absent	Absent	Inapplicable	Inapplicable	Uncertain
ROM 981820 L	41.9	32.6	-	Absent	Present	Absent	Inapplicable	Inapplicable	Uncertain
ROM 981820 R	24.7	-	22.1	Absent	Present	Absent	Inapplicable	Inapplicable	Uncertain
ROM 981866	-	-	-	Absent	Absent	Absent	Inapplicable	Inapplicable	Uncertain
ROM 982297	20.6	15.6	14.5	Present	Present	Absent	Inapplicable	Inapplicable	Uncertain
ROM 99596 a & b	26.2	-	18.8	Absent	Present	Absent	Inapplicable	Inapplicable	Uncertain
ROM 990768	-	-	-	Present	Present	Absent	Inapplicable	Inapplicable	Uncertain
ROM 990596	-	-	-	Present	Absent	Absent	Inapplicable	Inapplicable	Uncertain
ROM 991032	24.27	18.3	17.4	Absent	Present	Present	Absent	Absent	Possibly female
ROM 991485	-	-	-	Present	Present	Absent	Inapplicable	Inapplicable	Uncertain
ROM 991811	27.7	20.1	-	Absent	Present	Present	Absent	Absent	Possibly female
ROM IP 56629 a & b	-	-	-	Present	Present	Absent	Inapplicable	Inapplicable	Uncertain
ROM IP 56629 a & b	-	-	-	Present	Present	Absent	Inapplicable	Inapplicable	Uncertain
ROM IP 56638 a & b	-	-	-	Present	Present	Absent	Inapplicable	Inapplicable	Uncertain
ROM IP 56639	25.33	-	17.68	Present	Present	Uncertain	Absent	Absent	Uncertain
USNM 116227	6.8	4.1	5	Absent	Absent	Absent	Inapplicable	Inapplicable	Uncertain
USNM 116228A	4.9	-	3.6	Absent	Absent	Absent	Inapplicable	Inapplicable	Uncertain
USNM 116228B	-	-	-	Absent	Absent	Absent	Inapplicable	Inapplicable	Uncertain
USNM 165685	-	-	-	Absent	Absent	Absent	Inapplicable	Inapplicable	Uncertain
USNM 165686	-	-	-	Absent	Absent	Absent	Inapplicable	Inapplicable	Uncertain
USNM 188572	-	-	-	Absent	Absent	Absent	Inapplicable	Inapplicable	Uncertain
USNM 188573	-	-	-	Absent	Present	Uncertain	Absent	Absent	Uncertain
USNM 188574	-	-	-	Absent	Present	Uncertain	Absent	Absent	Uncertain
USNM 189800	-	-	-	Absent	Absent	Absent	Inapplicable	Inapplicable	Uncertain
USNM 194000	-	-	-	Absent	Absent	Absent	Inapplicable	Inapplicable	Uncertain
USNM 272513	3.7	2	2.5	Absent	Absent	Absent	Inapplicable	Inapplicable	Uncertain
USNM 272672	-	-	-	Absent	Present	Absent	Inapplicable	Inapplicable	Uncertain
USNM 272673	22.2	-	14.4	Absent	Absent	Absent	Inapplicable	Inapplicable	Uncertain
USNM 272676	33.4	23.7	21.4	Absent	Present	Absent	Inapplicable	Inapplicable	Uncertain
USNM 272725	2.1	-	1.8	Absent	Absent	Absent	Inapplicable	Inapplicable	Uncertain
USNM 273310	-	-	-	Absent	Present	Present	Absent	Absent	Possibly female
USNM 273311	48.5	40.4	35.1	Present	Present	Present	Absent	Absent	Likely female
USNM 273312	55.8	43.9	36.1	Absent	Absent	Absent	Inapplicable	Inapplicable	Uncertain
USNM 273313	-	-	-	Absent	Absent	Absent	Inapplicable	Inapplicable	Uncertain
USNM 273314	2.5	-	1.9	Absent	Absent	Absent	Inapplicable	Inapplicable	Uncertain
USNM 273315	1.9	1.1	1.2	Absent	Absent	Absent	Inapplicable	Inapplicable	Uncertain
USNM 273316	3.5	-	3	Absent	Absent	Absent	Inapplicable	Inapplicable	Uncertain
USNM 273317 L	3.3	2.7	2.6	Absent	Absent	Absent	Inapplicable	Inapplicable	Uncertain
USNM 273317 R	5.7	3.7	3.9	Absent	Absent	Absent	Inapplicable	Inapplicable	Uncertain
USNM 274169	25.7	20.5	20.1	Absent	Present	Present	Absent	Absent	Possibly female
USNM 375463	29.3	-	18.4	Absent	Present	Present	Absent	Absent	Possibly female
USNM 375464	29.8	21.6	18.9	Absent	Absent	Absent	Inapplicable	Inapplicable	Uncertain
USNM 375465	-	-	-	Present	Present	Present	Absent	Absent	Possibly female
USNM 57656	28.6	23.9	23.1	Present	Present	Present	Absent	Absent	Possibly female
USNM 57685	-	-	-	Present	Absent	Absent	Inapplicable	Inapplicable	Uncertain
USNM 58588A	27.4	23.9	23.4	Present	Present	Present	Absent	Absent	Possibly female
USNM 58588B	-	-	-	Present	Present	Present	Absent	Absent	Possibly female
USNM 58589	-	-	-	Absent	Present	Present	Absent	Absent	Possibly female
USNM 58590 (65513)	-	-	-	Absent	Present	Absent	Inapplicable	Inapplicable	Uncertain
USNM 58591	-	-	-	Absent	Present	Absent	Inapplicable	Inapplicable	Uncertain
USNM 65510	23.1	18.2	17.6	Present	Present	Present	Absent	Absent	Possibly female
USNM 65514	-	-	-	Absent	Present	Present	Absent	Absent	Possibly female
USNM 65515	-	-	-	Absent	Present	Uncertain	Absent	Absent	Uncertain
USNM 65519	28.4	-	22.3	Absent	Present	Absent	Inapplicable	Inapplicable	Uncertain
USNM 65520	25.4	18.1	-	Absent	Present	Absent	Inapplicable	Inapplicable	Uncertain
USNM 65521	-	-	-	Absent	Present	Present	Absent	Absent	Possibly female
USNM 65533	-	-	-	Absent	Absent	Absent	Inapplicable	Inapplicable	Uncertain
